# Supplementary material for: Reprograming gene expression in ‘hibernating’ C. elegans involves the IRE-1/XBP-1 pathway
Source: eLife. 2025 May 6;13:RP101186. doi: 10.7554/eLife.101186 (PMC12055002; doi:10.7554/eLife.101186)
Supplement: Supplementary file 5. [file elife-101186-supp5.xlsx]

## Sheet: Sheet1
	Overlapping genes related to Figure 7 - figure supplement 1.
	This study and only Shen et al., 2005	This study and only Dudkevich et al., 2022	This study, Shen et al., 2005 and Dudkevich et al., 2022	This study and Koh et al., 2018
	fipr-24	C23H4.6	rrf-2	B0024.4
	bre-1	trhr-1	sdz-35	B0205.13
	fbxa-141	F08G2.5		B0348.2
	fis-2	tir-1		B0403.3
	srp-7	gst-24		C06G3.3
	F22E5.6	nhr-3		C08E8.4
	ipla-2	M01G12.9		C10C5.4
	apm-1	M60.7		C17H11.6
	sec-22	sma-5		C18H7.11
	cdr-4	lys-3		C25F9.11
	T12D8.5	Y47H10A.5		C25F9.5
	lips-11	nhr-247		C27D8.3
	clec-121	ZK418.7		rcs-1
	Y54G2A.18			ampd-1
				C34H4.1
				crb-3
				C43C3.4
				C44H9.4
				C50F4.8
				C53C11.5
				C54F6.15
				C54F6.5
				F09C8.2
				F15B9.6
				F16H6.10
				F19B2.5
				F20D6.8
				F20G2.5
				F22H10.2
				cld-9
				F37C4.5
				F40F12.9
				F53C11.1
				F59A7.2
				K10G4.3
				txt-19
				M04C3.1
				Y37H2A.14
				asp-17
				ZC239.14
