# Supplementary figures and images for: Reprograming gene expression in ‘hibernating’ C. elegans involves the IRE-1/XBP-1 pathway
Source: eLife journal article supplement (doi:10.7554/elife.101186), 2024-10-15

Puromycin low exposure

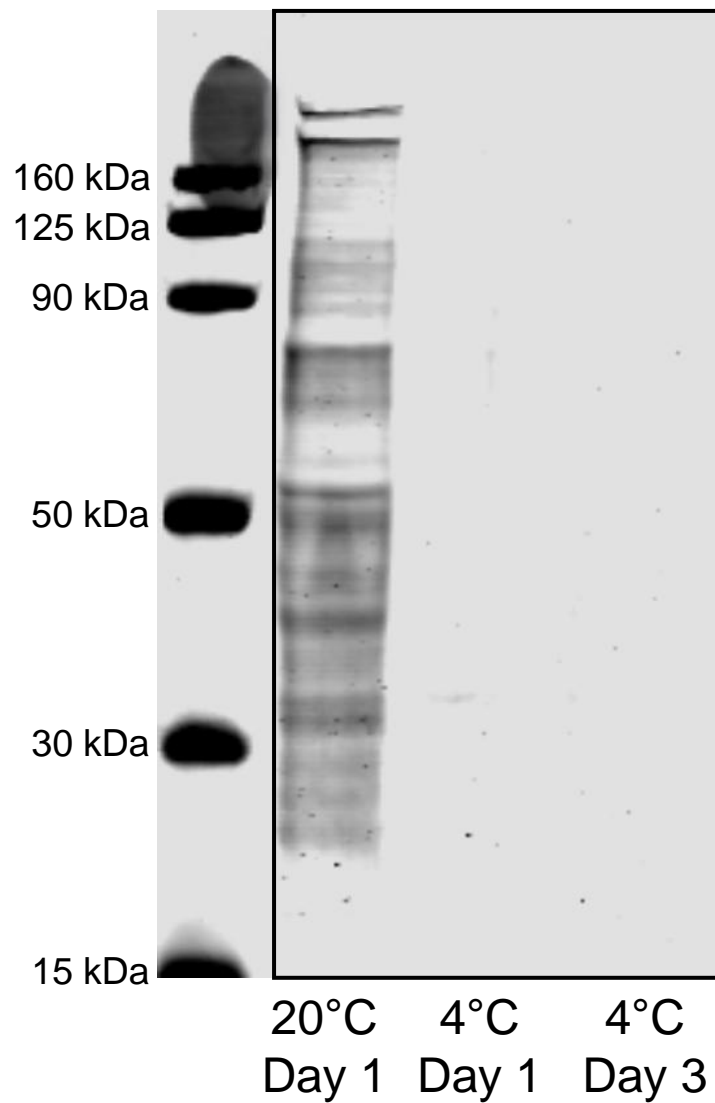

Puromycin high exposure

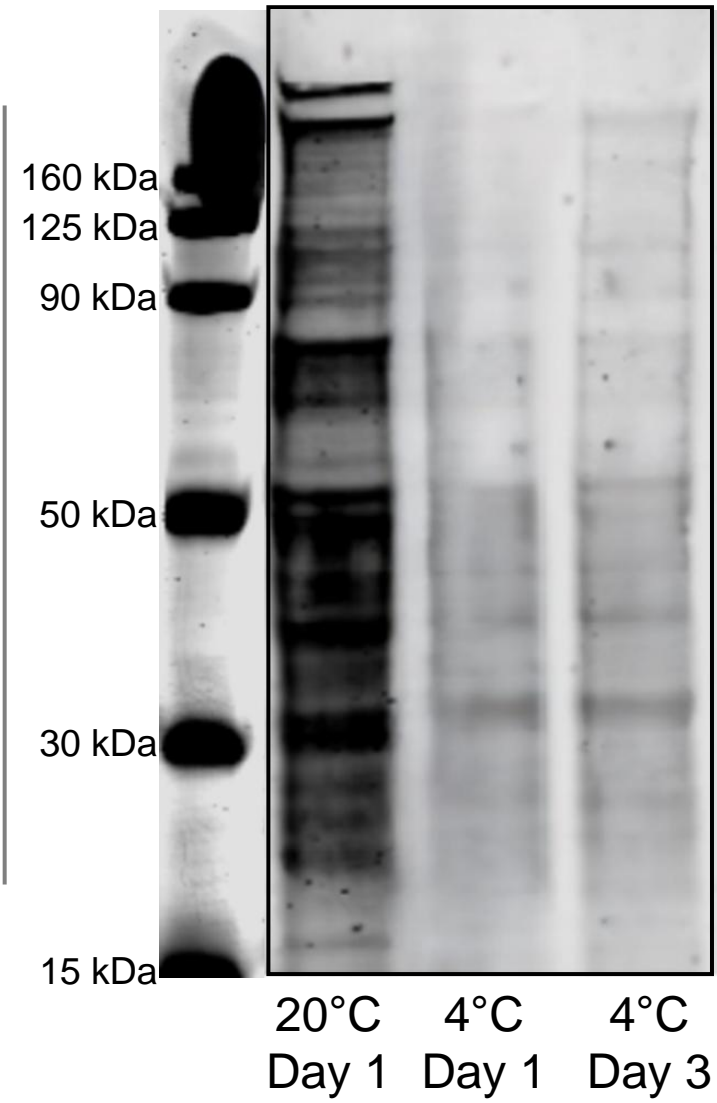

Actin

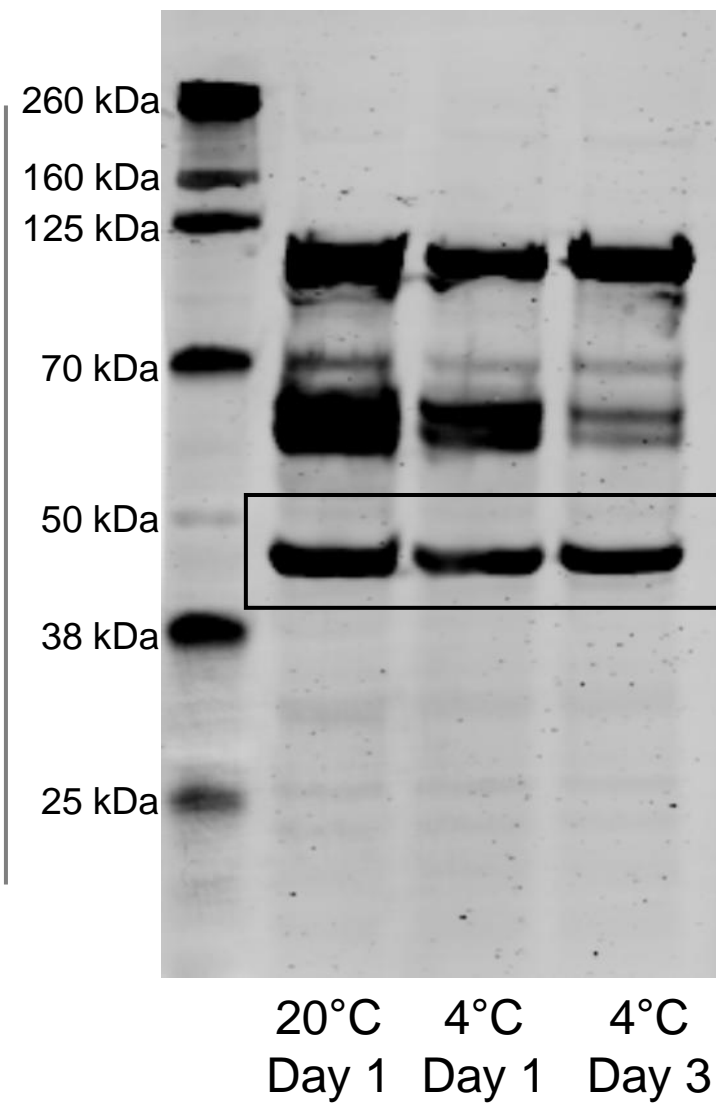

Supplement: fig1-figsupp1-data1 [file elife-101186-fig1-figsupp1-data1-v1.zip]
